# Supplementary material
Source: Elsevier journal article supplement (https://www.sciencedirect.com/science/article/pii/S0214460319300725)
Supplement: mmc1 [file S0214460319300725:mmc1.docx]

**Appendix A: Stimulus Words**

Voiced Initial CC Unvoiced Initial CC

1. bruto 1. plancha

2. bright 2. plane

3. bruja 3. flor

4. broom 4. flag

5. brush 5. problema

6. brillo 6. progress

7. dragon 7. plata

8. dráma 8. plate

9. green 9. cheese

10. grande. 10. chicle

Tense Initial CV Lax Initial CV

1. carta 1. card

2. café 2. car

3. lísta 3. cartoon

4. leash 4. poster

5. libro 5. cup

6.muñeca

7. moon

8. carro

9. cuchillo

10. movie.

11. lollipop

12. lapis

13. postre

14. corte
